# Supplementary material
Source: MDPI journal article supplement (https://www.mdpi.com/2073-4433/14/7/1167)
Supplement: s1 [file s1]

## Supplementary material

**Table S1.** Emission factors

| Vehicle category          | Fuel     | CO <sub>2</sub> *<br>(g/kg) | CH <sub>4</sub> **<br>kgCH <sub>4</sub> /TJ | N <sub>2</sub> O*<br>(g/kg) | CO*<br>(g/kg) | NMVOC*<br>(g/kg) | NO <sub>x</sub> *<br>(g/kg) | SO <sub>2</sub> ***<br>KgSO <sub>2</sub> /TJ | NH <sub>3</sub> *<br>(g/kg) | PM*<br>(g/kg) | BC*<br>(%PM) |
|---------------------------|----------|-----------------------------|---------------------------------------------|-----------------------------|---------------|------------------|-----------------------------|----------------------------------------------|-----------------------------|---------------|--------------|
| Personal cars             | Gasoline | 3,169                       | 25                                          | 0.32                        | 269           | 34.42            | 29.89                       | 3.5705                                       | 1.106                       | 0.03          | 0.12         |
|                           | Gas oil  | 3,169                       | 3.9                                         | 0.107                       | 8.19          | 1.88             | 13.88                       | 2.9676                                       | 0.065                       | 1.1           | 0.57         |
| Light commercial vehicles | Gasoline | 3,169                       | 25                                          | 0.316                       | 283           | 26.08            | 25.46                       | 3.5705                                       | 0.667                       | 0.02          | 0.05         |
|                           | Gas oil  | 3,169                       | 3.9                                         | 0.072                       | 11.71         | 1.96             | 18.43                       | 2.9676                                       | 0.038                       | 1.52          | 0.55         |
| Heavy                     | Gas oil  | 3,169                       | 3.9                                         | 0.089                       | 7.58          | 3.77             | 38.29                       | 2.9676                                       | 0.013                       | 0.94          | 0.53         |
| Motorcycle                | Gasoline | 3,169                       | 25                                          | 0.067                       | 664           | 364.8            | 10.73                       | 3.5705                                       | 0.059                       | 2.2           | 0.11         |

\* EMEP/EEA air pollutant emission inventory guidebook 2019 (cita) \*\* 2006 IPCC Guidelines for National Greenhouse Inventories (cita) \*\*\* 2016 UPME FECOC calculator (Colombian fuel emission factors) (Cita). The emission factors provided by the EMEP/EEA database and the IPCC have a 95% confidence interval.

**Table S2.** Quality standard of Gasoline

| Normative                | Parameter/ validity | Units  | Value                       |
|--------------------------|---------------------|--------|-----------------------------|
| Resolution 1190 de 2006  | Maximum lead        | g/l    | April 1, 2021<br>0.013      |
|                          |                     |        | December 31, 2010<br>0.013  |
|                          | Aromatics           | %vol   | April 1, 2001<br>28         |
|                          |                     |        | December 31, 2010<br>28     |
|                          | Benzene             | %vol   | April 1, 2001<br>1          |
|                          |                     |        | December 31, 2010<br>1      |
|                          | Sulfur              | ppm    | July 1, 2007<br>1000        |
|                          |                     |        | December 31, 2010<br>300    |
| Resolution 40103 de 2021 | Maximum lead        | g/L    | 0.013                       |
|                          | Aromatics           | %(V/V) | 28                          |
|                          | Benzene             | %(V/V) | 2                           |
|                          | Sulfur              | ppm    | As of April 20, 2021<br>300 |
|                          |                     |        | As of May 1, 2021<br>100    |

|                         |    |
|-------------------------|----|
| As of December 31, 2021 | 50 |
| As of December 31, 2030 | 10 |

**Table S3.** Quality standard of Diesel

| <b>Normative</b>              | <b>Parameter/ validity</b> |                         | <b>Units</b> | <b>Value</b> |
|-------------------------------|----------------------------|-------------------------|--------------|--------------|
| <b>Resolution 1190/2006</b>   | Maximum sulfur             | As of December 31, 2010 | ppm          | 500          |
|                               | Maximum aromatics          |                         | %vol         | 35           |
|                               | Biofuel content, maximum   | As of January, 2008     | %vol         | 5            |
| <b>Resolution 9-0963/2014</b> | Maximum sulfur             |                         | ppm          | 50           |
|                               | Maximum aromatics          | As of July 31, 2016     | %vol         | 35           |
|                               | Biofuel content            |                         | %vol         | 10           |
| <b>Resolution 40103/2021</b>  | Maximum sulfur             | Until April 30, 2021    | ppm          | 50           |
|                               |                            | As of May 1, 2021       |              | 20           |
|                               |                            | As of January 1, 2023   |              | 15           |
|                               |                            | As of December, 2025    |              | 10           |
|                               | Aromatic hydrocarbons      | Polycyclic aromatic     | %(m/m)       | 8            |

Table S4. Regional emissions of ozone precursors, acidifying gases and aerosols (Gg)

| Regions-pollutant | 2010      | 2011   | 2012   | 2013   | 2014   | 2015   | 2016   | 2017   | 2018     | 2019     | 2020     | 2021   |          |
|-------------------|-----------|--------|--------|--------|--------|--------|--------|--------|----------|----------|----------|--------|----------|
| Andean            | CO        | 668.10 | 731.64 | 755.02 | 785.00 | 824.96 | 914.29 | 994.50 | 1,001.96 | 1,033.57 | 1,087.47 | 903.10 | 1,170.11 |
|                   | NMVOC     | 56.11  | 61.67  | 63.59  | 65.91  | 69.08  | 76.08  | 82.19  | 82.70    | 85.31    | 89.48    | 74.45  | 95.69    |
|                   | NOx       | 117.87 | 131.71 | 135.29 | 138.22 | 143.19 | 153.00 | 159.88 | 159.80   | 164.82   | 170.20   | 143.01 | 176.31   |
|                   | SO2       | 0.49   | 0.54   | 0.56   | 0.57   | 0.60   | 0.65   | 0.69   | 0.69     | 0.71     | 0.74     | 0.62   | 0.78     |
|                   | NH3       | 1.64   | 1.80   | 1.86   | 1.93   | 2.03   | 2.25   | 2.44   | 2.46     | 2.54     | 2.67     | 2.22   | 2.87     |
|                   | PM        | 1.90   | 2.11   | 2.17   | 2.22   | 2.31   | 2.48   | 2.61   | 2.62     | 2.70     | 2.80     | 2.34   | 2.92     |
|                   | BC        | 1.20   | 1.36   | 1.39   | 1.41   | 1.45   | 1.51   | 1.54   | 1.54     | 1.58     | 1.62     | 1.37   | 1.63     |
|                   | Amazon    | CO     | 20.01  | 23.20  | 23.45  | 26.32  | 28.56  | 32.59  | 35.95    | 36.92    | 38.24    | 40.71  | 40.89    |
| NMVOC             |           | 1.87   | 1.87   | 1.89   | 2.13   | 2.30   | 2.59   | 2.85   | 2.92     | 3.01     | 3.21     | 3.21   | 4.23     |
| NOx               |           | 2.70   | 3.23   | 3.20   | 3.73   | 3.88   | 4.07   | 4.35   | 4.36     | 4.42     | 4.71     | 4.59   | 5.90     |
| SO2               |           | 0.01   | 0.01   | 0.01   | 0.02   | 0.02   | 0.02   | 0.02   | 0.02     | 0.02     | 0.02     | 0.02   | 0.03     |
| NH3               |           | 0.05   | 0.06   | 0.06   | 0.06   | 0.07   | 0.08   | 0.09   | 0.09     | 0.09     | 0.10     | 0.10   | 0.13     |
| PM                |           | 0.05   | 0.05   | 0.05   | 0.06   | 0.07   | 0.07   | 0.08   | 0.08     | 0.08     | 0.08     | 0.08   | 0.10     |
| BC                |           | 0.02   | 0.03   | 0.03   | 0.03   | 0.03   | 0.03   | 0.03   | 0.03     | 0.03     | 0.03     | 0.03   | 0.04     |
| Pacific           |           | CO     | 162.54 | 201.44 | 205.62 | 214.16 | 230.53 | 262.73 | 294.46   | 303.48   | 317.41   | 333.44 | 289.89   |
|                   | NMVOC     | 13.52  | 16.83  | 17.25  | 17.92  | 19.19  | 21.66  | 24.04  | 24.69    | 25.79    | 27.04    | 23.61  | 28.40    |
|                   | NOx       | 27.12  | 34.50  | 36.07  | 37.03  | 38.61  | 41.66  | 43.87  | 44.25    | 45.89    | 47.58    | 42.53  | 48.73    |
|                   | SO2       | 0.11   | 0.14   | 0.15   | 0.15   | 0.16   | 0.18   | 0.19   | 0.20     | 0.21     | 0.21     | 0.19   | 0.22     |
|                   | NH3       | 0.40   | 0.50   | 0.51   | 0.53   | 0.57   | 0.65   | 0.72   | 0.75     | 0.78     | 0.82     | 0.71   | 0.86     |
|                   | PM        | 0.44   | 0.56   | 0.58   | 0.60   | 0.63   | 0.68   | 0.73   | 0.74     | 0.77     | 0.80     | 0.71   | 0.82     |
|                   | BC        | 0.27   | 0.35   | 0.37   | 0.37   | 0.38   | 0.40   | 0.40   | 0.40     | 0.41     | 0.42     | 0.39   | 0.42     |
|                   | Caribbean | CO     | 134.07 | 142.44 | 155.87 | 167.93 | 189.47 | 232.45 | 274.81   | 281.43   | 299.44   | 328.99 | 288.80   |

|           |                 |       |       |       |       |       |       |       |       |       |       |       |       |
|-----------|-----------------|-------|-------|-------|-------|-------|-------|-------|-------|-------|-------|-------|-------|
| Orinoquia | NM VOC          | 11.84 | 12.68 | 13.65 | 14.64 | 16.30 | 19.74 | 22.99 | 23.40 | 24.92 | 27.25 | 23.99 | 31.93 |
|           | NO <sub>x</sub> | 30.40 | 33.46 | 34.03 | 35.90 | 37.92 | 43.57 | 47.44 | 46.86 | 50.14 | 53.60 | 47.85 | 60.64 |
|           | SO <sub>2</sub> | 0.12  | 0.13  | 0.13  | 0.14  | 0.15  | 0.18  | 0.20  | 0.20  | 0.21  | 0.23  | 0.20  | 0.26  |
|           | NH <sub>3</sub> | 0.33  | 0.35  | 0.38  | 0.41  | 0.47  | 0.57  | 0.68  | 0.69  | 0.74  | 0.81  | 0.71  | 0.95  |
|           | PM              | 0.47  | 0.52  | 0.53  | 0.56  | 0.60  | 0.69  | 0.77  | 0.76  | 0.81  | 0.87  | 0.78  | 1.00  |
|           | BC              | 0.35  | 0.39  | 0.38  | 0.40  | 0.41  | 0.46  | 0.48  | 0.46  | 0.50  | 0.52  | 0.47  | 0.58  |
|           | CO              | 36.18 | 42.18 | 44.46 | 47.13 | 50.52 | 58.75 | 63.27 | 62.58 | 64.21 | 71.39 | 70.68 | 89.28 |
|           | NM VOC          | 3.23  | 3.84  | 4.06  | 4.28  | 4.57  | 5.14  | 5.43  | 5.36  | 5.47  | 6.10  | 5.96  | 7.45  |
|           | NO <sub>x</sub> | 8.62  | 10.95 | 11.64 | 12.06 | 12.71 | 12.79 | 12.47 | 12.30 | 12.25 | 13.83 | 12.73 | 15.22 |
|           | SO <sub>2</sub> | 0.03  | 0.04  | 0.04  | 0.04  | 0.05  | 0.05  | 0.05  | 0.05  | 0.05  | 0.06  | 0.05  | 0.06  |
|           | NH <sub>3</sub> | 0.09  | 0.10  | 0.11  | 0.12  | 0.12  | 0.14  | 0.16  | 0.15  | 0.16  | 0.18  | 0.17  | 0.22  |
|           | PM              | 0.13  | 0.17  | 0.18  | 0.18  | 0.19  | 0.20  | 0.20  | 0.19  | 0.19  | 0.22  | 0.20  | 0.25  |
|           | BC              | 0.10  | 0.13  | 0.14  | 0.14  | 0.15  | 0.14  | 0.13  | 0.13  | 0.13  | 0.15  | 0.13  | 0.15  |
